# Supplementary material for: The Catalytic Domain of Neuropathy Target Esterase Influences Lipid Droplet Biogenesis and Lipid Metabolism in Human Neuroblastoma Cells
Source: MDPI journal article supplement (doi:10.3390/metabo12070637), 2022-07-12
Supplement: s1 [file s1]

# Supplementary material

## Supplementary methods

### Immunoblot analysis

After transfection for 48 h, total protein samples were prepared by sonication in RIPA Buffer containing 1 mM phenylmethanesulfonyl fluoride (PMSF), and then centrifuged at 4°C and 15,000 g for 15 min to pellet the cell debris. The supernatant protein concentration was determined with BCA Protein Assay Kit (Beyotime Biotechnology). The supernatant was mixed with 5 × SDS loading buffer and boiled for 5 min. All the samples were subjected to SDS/PAGE, transferred to nitrocellulose filters and subjected to immunoblotting analysis using anti-GFP antibody (1:1000 dilution) as described previously [42].

### Oil red O staining

SK-N-SH and SK/NEST cells were incubated with 0.2 mM OA for 12h. After washing with PBS, cells were fixed with 4% paraformaldehyde in PBS for 10 min at room temperature and then subjected to Oil red O staining. Cell images were acquired using an Olympus IX71 inverted microscope.

## Supplementary Figures

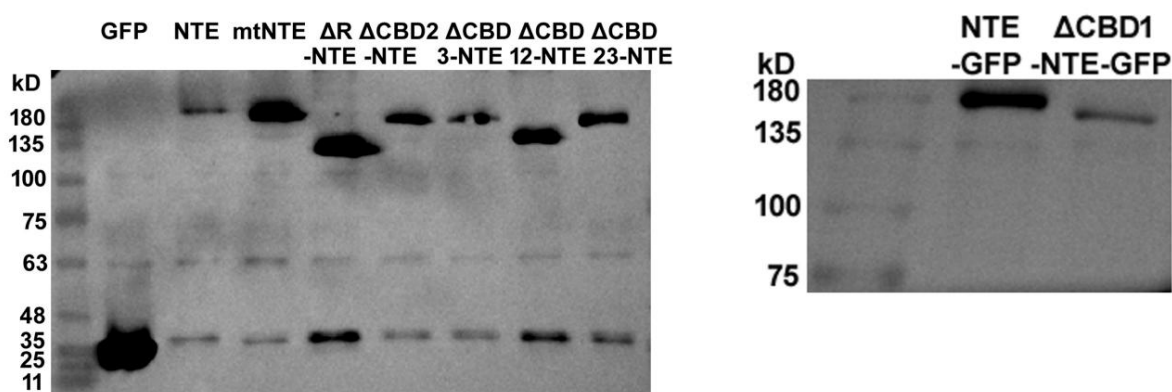

**Figure S1.** The expressions of GFP, NTE and its truncation mutants in whole cell lysis were detected by immunoblotting using anti-GFP antibody.

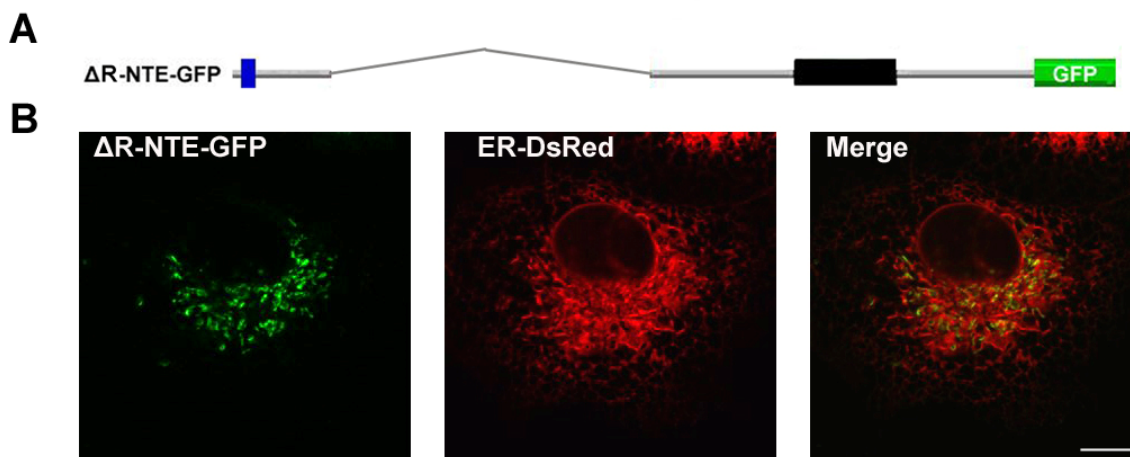

**Figure S2.** NTE deleting the R-region induced ER aggregation. A, domain architecture of ΔR-NTE-GFP. B, ΔR-NTE-GFP was expressed in COS-7 and the ER was marked by co-expression of ER-DsRed. Images were acquired by confocal fluorescence microscopy. Scale bars = 10 μm.

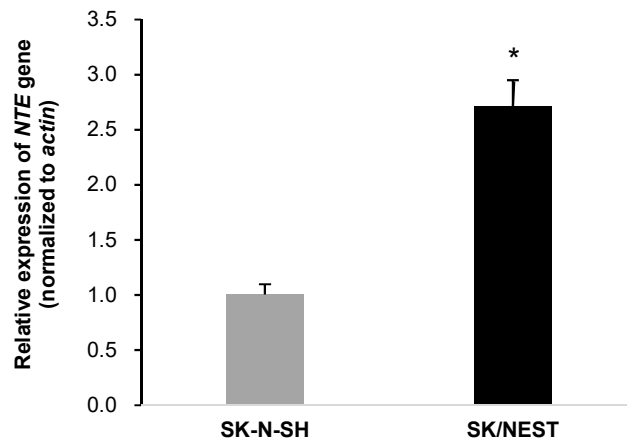

**Figure S3.** The expression of *NTE* gene was quantified by RT-qPCR. mRNA levels in SK-N-SH and SK/NEST cells were quantified by qPCR using *actin* as a reference gene and presented as fold change of SK-N-SH cells. Data are presented as means  $\pm$  SD. Asterisk indicated *P* values: \*  $P < 0.05$ ,  $n = 5$ .

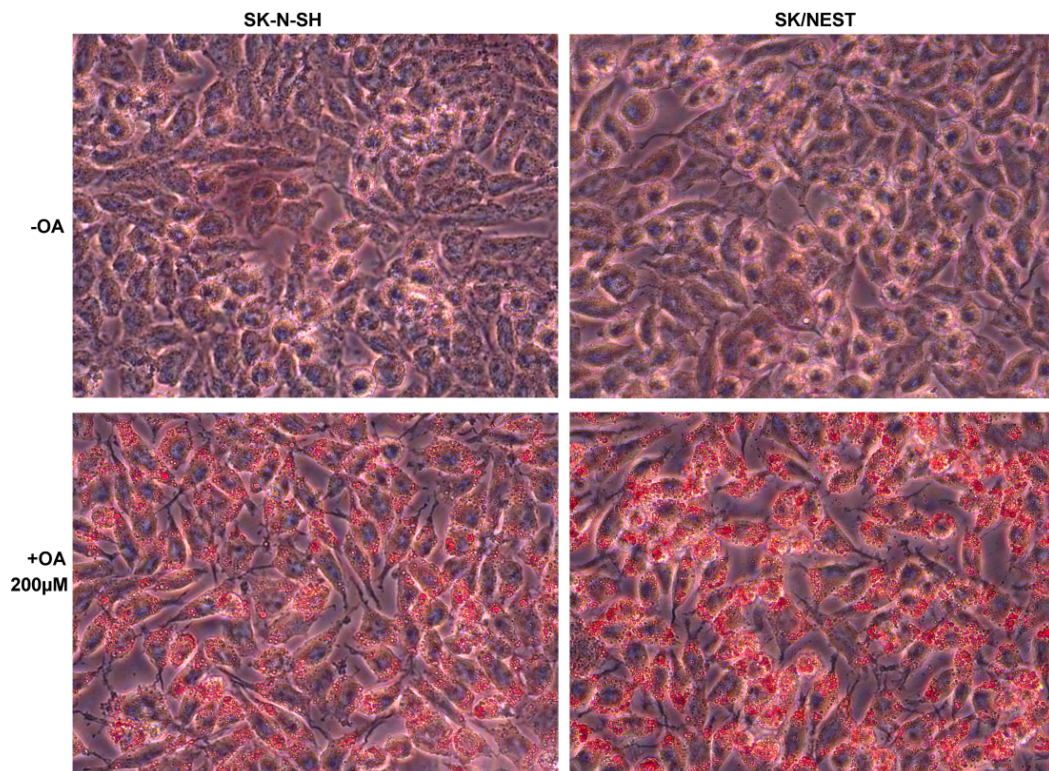

**Figure S4.** Oil red O staining in SK-N-SH and SK/NEST cells. Cells were loaded with 0.2 mM OA for 12 h or not and then stained with oil red O. Figures were representative of three separate experiments.

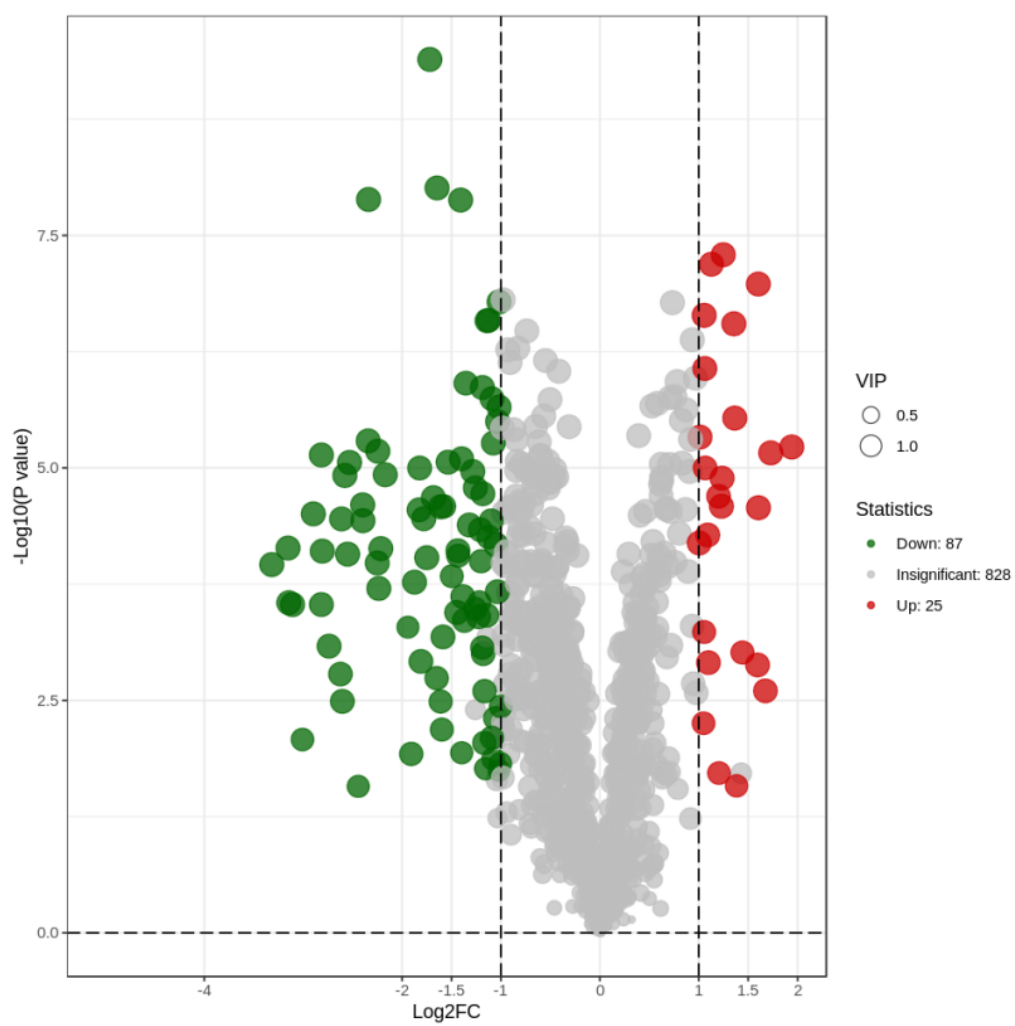

**Figure S5.** Volcano map showed the differential metabolites between SK/NEST and SK-N-SH cells selected by  $\text{VIP} \geq 1$ ,  $\text{FC} \geq 2.0$  or  $\text{FC} \leq 0.50$ .

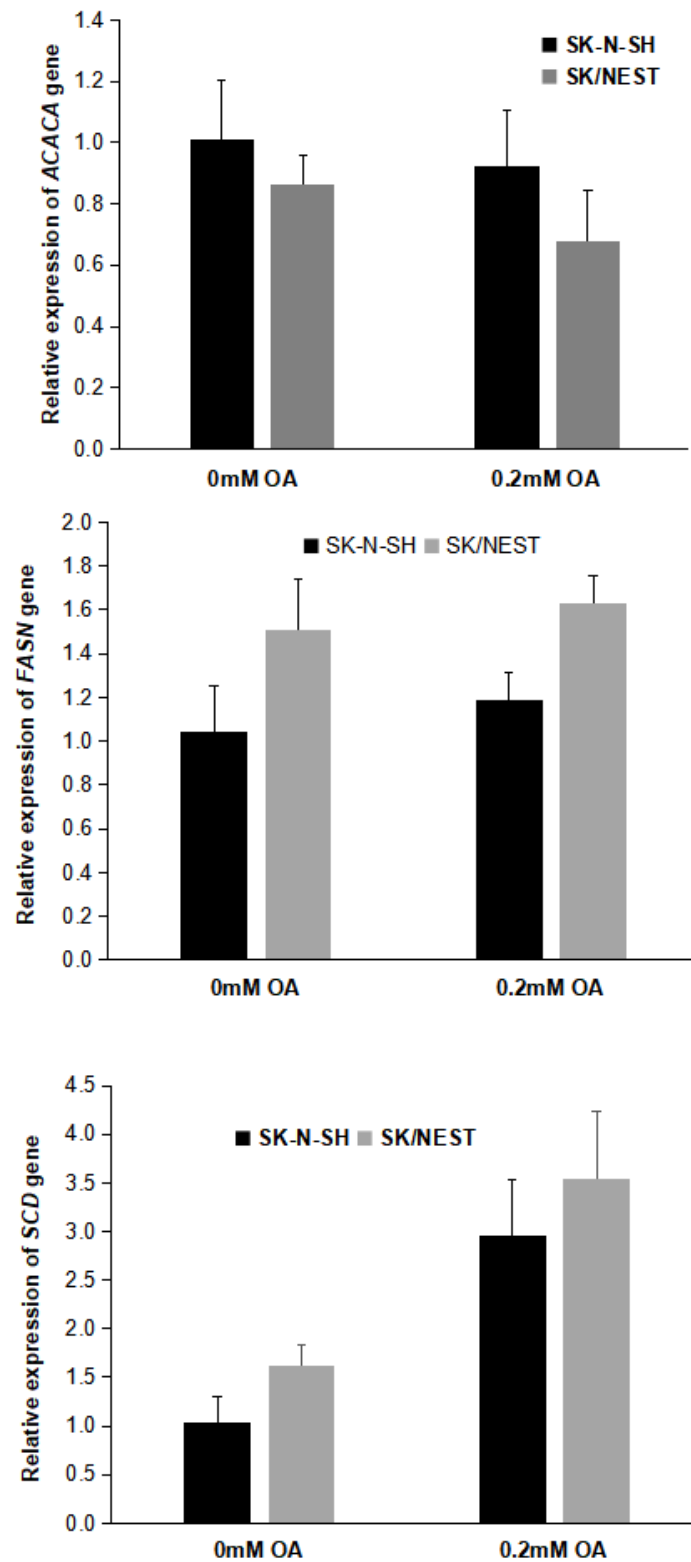

**Figure S6.** The expression of genes related to FA biosynthesis affected by NEST overexpression. mRNA levels were quantified by qPCR using  $\beta$ -actin as a reference gene and presented as fold change of SK-N-SH cells without OA treatment. Data are presented as means  $\pm$  SD. n = 5.

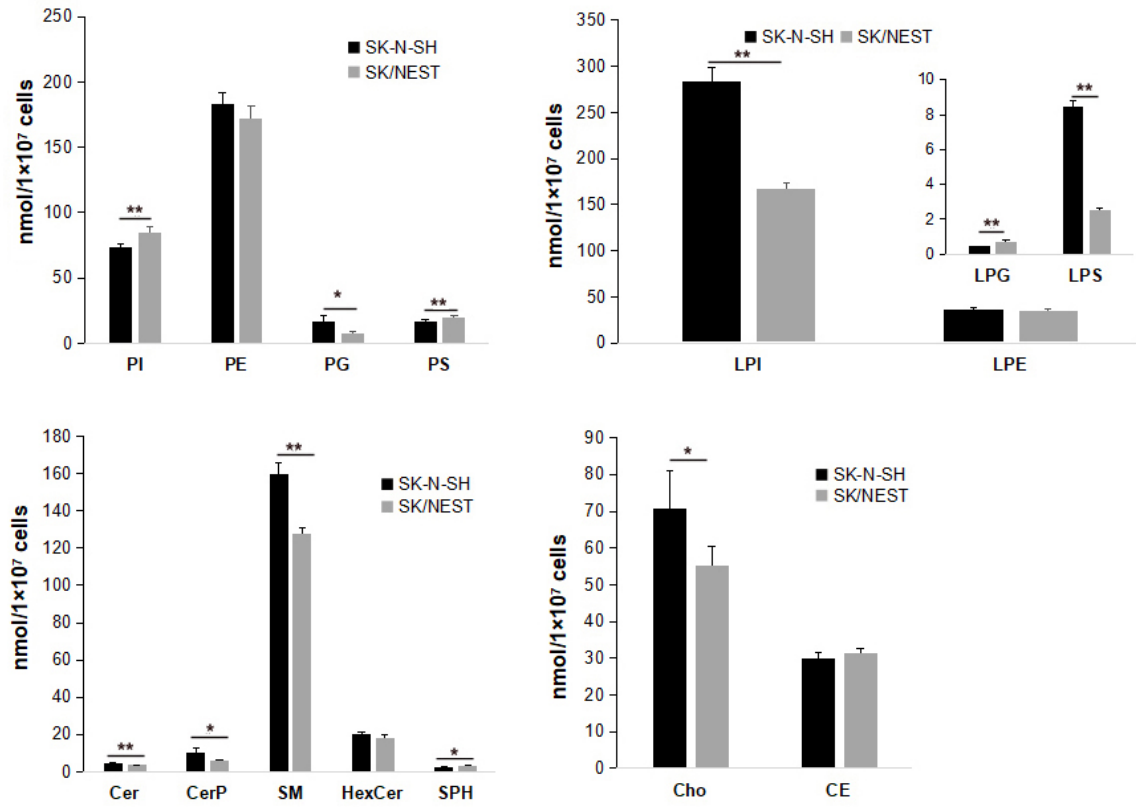

**Figure S7.** Effect of NEST overexpression on different lipids contents in human neuroblastoma cells. Data were presented as means  $\pm$  SD. Asterisk indicated p values: \* *P* < 0.05, \*\* *P* < 0.01, n = 5.
